# Supplementary material for: Fabrication of Subnanometer-Precision Nanopores in Hexagonal Boron Nitride
Source: PubMed Central journal article supplement (PMC5678191; doi:10.1038/s41598-017-12684-x), 2017-11-08
Supplement: 41598_2017_12684_MOESM1_ESM.pdf [file 41598_2017_12684_MOESM1_ESM.pdf]

Supplementary Figures for

## **Fabrication of Subnanometer-Precision Nanopores in Hexagonal Boron Nitride**

S. Matt Gilbert<sup>‡,1,2,3</sup>, Gabriel Dunn<sup>‡,1,2,3</sup>, Amin Azizi<sup>1,3</sup>, Thang Pham<sup>1,2,3</sup>, Brian Shevitski<sup>1,2,3,4</sup>, Edgar Dimitrov<sup>1,3</sup>, Stanley Liu<sup>1,3</sup>, Shaul Aloni<sup>4</sup> and Alex Zettl<sup>\*,1,2,3</sup>.

<sup>1</sup> Department of Physics, University of California at Berkeley, Berkeley, CA 94720, USA

<sup>2</sup> Materials Sciences Division, Lawrence Berkeley National Laboratory, Berkeley, CA 94720, USA

<sup>3</sup> Kavli Energy NanoScience Institute at the University of California, Berkeley and the Lawrence Berkeley National Laboratory, Berkeley, CA 94720, USA

<sup>4</sup> Molecular Foundry, Lawrence Berkeley National Laboratory, Berkeley, CA 94720, USA

<sup>‡</sup>SMG and GD contributed equally to this work.

Correspondence and requests for materials should be addressed to A.Z. (email [azettl@berkeley.edu](mailto:azettl@berkeley.edu))

**Figure S1**

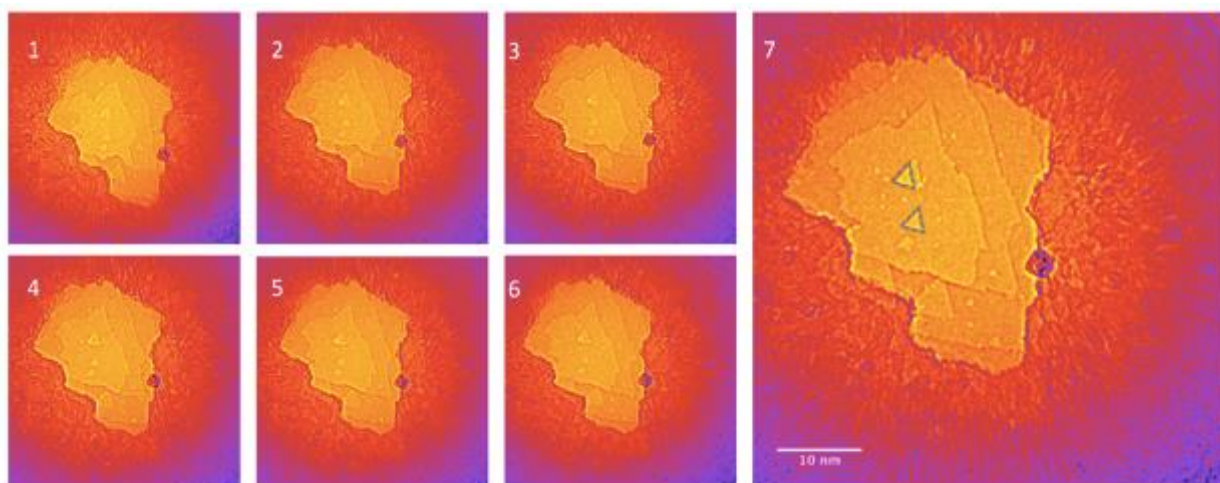

A time series showing the growth of the nanopore the nanopore highlighted in figure 2(f) from a few-atom vacancy to 1.9 nm side length. In figure 3 (j) (inset) the growth of the nanopore highlighted in panel 7 on the left is compared to the growth of a vacancy that is not backed to vacuum highlighted on the right.

**Figure S2**

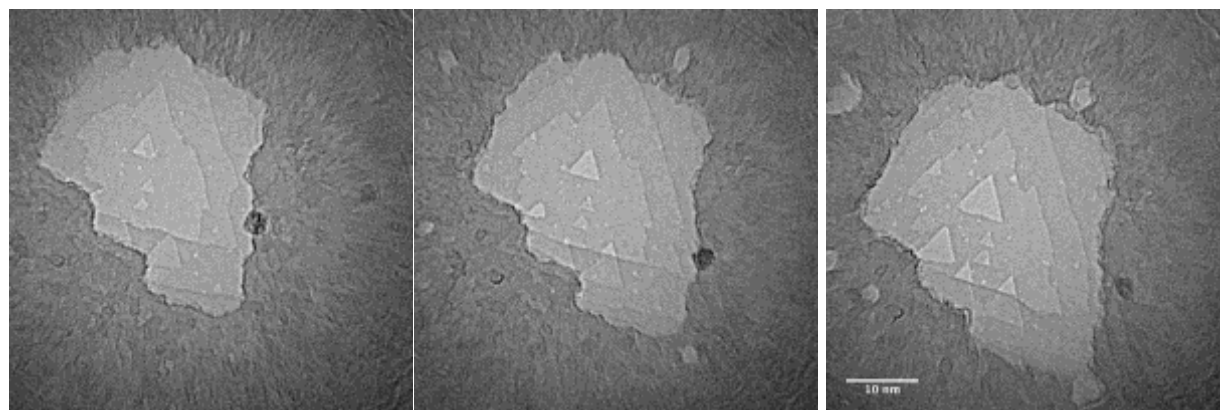

A time series of the nanopore formed in figure 2 showing the growth of the nanopore from 2 nm to 7 nm. In the middle panel, two other nanopores have formed. In the right panel four additional pores have formed.

**Figure S3**

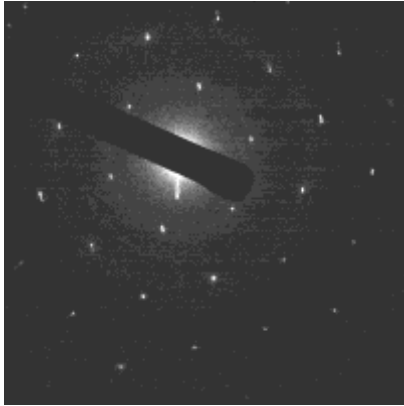

Selected area electron diffraction of the sample studied for these measurements.

**Figure S4**

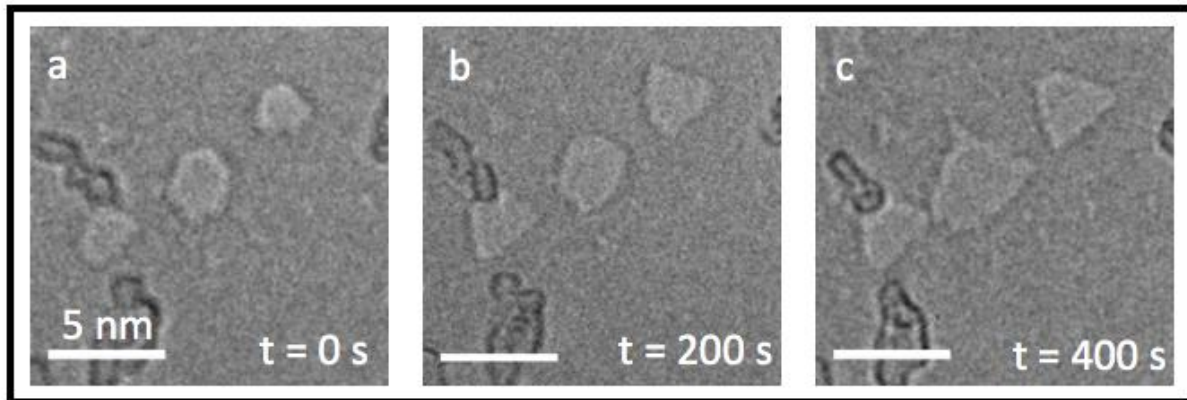

A time series of the evolution of hexagonal h-BN nanopores after the beam is reduced from  $\sim 70 \text{ A/cm}^2$  to  $\sim 20 \text{ A/cm}^2$  at time  $t = 0$ . Frames a.), b.), and c.) respectively show the sample after 0 seconds (image taken almost immediately upon spreading the beam), 200 seconds, and 400 seconds of exposure under the  $\sim 6 \text{ A/cm}^2$  beam. After the hexagonal shapes are formed at the the high beam current density, the vacancies grow into a triangle shape at the lower beam current density. All scale bars are 5 nm.
